# Supplementary material for: The Fecal Microbiome in Dogs with Acute Diarrhea and Idiopathic Inflammatory Bowel Disease
Source: PubMed Central journal article supplement (PMC3530590; doi:10.1371/journal.pone.0051907), 2012-12-26
Supplement: pone.0051907.s002.pdf [file pone.0051907.s002.pdf]

**Table S2. Dogs with acute hemorrhagic diarrhea (AHD) and acute non-hemorrhagic diarrhea (NHD)**

| ID   | Age (yrs) | Breed                | Sex | Weight (lbs) | Antibiotic history | Disease | CPE (ELISA) | <i>cpe</i> (PCR) | <i>C. difficile</i> toxin A/B (ELISA) | gene for <i>C. difficile</i> toxin B (PCR) | culture/fecal cytology | Giardia/parasites |
|------|-----------|----------------------|-----|--------------|--------------------|---------|-------------|------------------|---------------------------------------|--------------------------------------------|------------------------|-------------------|
| HD1  | 8.0       | Yorkshire Terrier    | m   | 4.0          | none               | AHD     | -           | +                | +                                     | +                                          | -                      | n/a               |
| HD2  | 3.0       | Mixed breed          | fs  | 26.0         | none               | AHD     | +           | +                | -                                     | -                                          | n/a                    | n/a               |
| HD3  | 12.0      | Mixed breed          | m   | 17.6         | none               | AHD     | -           | -                | -                                     | -                                          | -                      | -                 |
| HD4  | 7.0       | Jack Russell Terrier | fs  | 19.8         | none               | AHD     | -           | +                | -                                     | -                                          | -                      | Giardia           |
| HD5  | 5.0       | Mixed breed          | m   | 68.3         | none               | AHD     | +           | +                | -                                     | -                                          | hem. E. coli           | -                 |
| HD6  | 13.0      | Viszla               | mn  | 61.7         | none               | AHD     | -           | +                | -                                     | -                                          | hem. E. coli           | -                 |
| HD7  | 3.0       | Mixed breed          | fs  | 11.1         | none               | AHD     | +           | +                | -                                     | -                                          | -                      | n/a               |
| HD8  | 16.0      | Poodle               | fs  | 19.4         | none               | AHD     | -           | +                | -                                     | -                                          | hem. E. coli           | -                 |
| HD9  | 7.0       | Labrador mix         | fs  | 62.8         | none               | AHD     | -           | +                | -                                     | -                                          | -                      | -                 |
| HD10 | 2.0       | Beagle               | m   | 25.1         | none               | AHD     | -           | -                | -                                     | -                                          | -                      | Giardia pos       |
| HD11 | 4.0       | Jack Russell Terrier | fs  | 13.8         | none               | AHD     | -           | +                | -                                     | -                                          | -                      | n/a               |
| HD12 | 3.0       | Jack Russell Terrier | fs  | 9.5          | none               | AHD     | -           | +                | -                                     | -                                          | hem. E. coli           | -                 |
| HD13 | 4.0       | Mixed breed          | m   | 57.3         | none               | AHD     | -           | +                | -                                     | -                                          | -                      | -                 |
| D1   | 1.5       | Labrador Retriever   | fs  | 61.7         | none               | NHD     | -           | +                | -                                     | -                                          | +++ EFR                | -                 |
| D2   | 11.0      | Mixed Breed          | fs  | 31.9         | none               | NHD     | -           | -                | -                                     | -                                          | naf                    | -                 |
| D3   | 15.0      | Cocker Spaniel       | mn  | 35.3         | none               | NHD     | -           | -                | -                                     | -                                          | naf                    | -                 |
| D4   | 7.0       | Chihuahua            | fs  | 5.5          | none               | NHD     | +           | n/a              | n/a                                   | n/a                                        | +++ EFR                | -                 |
| D5   | 2.3       | King Charles         | fs  | 13.2         | none               | NHD     | +           | +                | -                                     | -                                          | +EFR                   | -                 |
| D6   | 14.0      | Golden Retriever     | fs  | 54.5         | none               | NHD     | -           | +                | -                                     | -                                          | +EFR                   | -                 |
| D7   | 1.0       | Labrador mix         | mn  | 39.6         | none               | NHD     | -           | +                | -                                     | -                                          | +++ EFR                | -                 |
| D8   | 3.5       | Weimaraner           | m   | 62.0         | none               | NHD     | -           | -                | -                                     | -                                          | +EFR                   | C/G               |
| D9   | 8.5       | Labrador Retriever   | fs  | 60.0         | none               | NHD     | -           | +                | -                                     | -                                          | +EFR                   | -                 |
| D12  | 0.5       | Border Terrier       | m   | 16.0         | none               | NHD     | -           | -                | -                                     | -                                          | naf                    | Isospora          |
| D14  | 1.8       | German Shepherd Dog  | fs  | 70.0         | none               | NHD     | -           | -                | -                                     | -                                          | naf                    | -                 |
| D16  | 9.5       | Rottweiler mix       | fs  | 75.0         | none               | NHD     | +           | -                | -                                     | -                                          | naf                    | -                 |

m=male intact; f=female intact; mn=male neutered; fs=female spayed

EFR=endospore forming rods; C/G=positive for Cryptosporidium and Giardia on PCR

CPE=*C. perfringens* enterotoxin by ELISA; *cpe*=gene for *C. perfringens* enterotoxin (PCR)

naf=no abnormalities found; n/a=not evaluated
