# Supplementary material for: The Fecal Microbiome in Dogs with Acute Diarrhea and Idiopathic Inflammatory Bowel Disease
Source: PubMed Central journal article supplement (PMC3530590; doi:10.1371/journal.pone.0051907), 2012-12-26
Supplement: pone.0051907.s003.pdf [file pone.0051907.s003.pdf]

**Table S3. Dogs with active IBD and with therapeutically controlled IBD**

| Active IBD     | Age (yrs) | Breed                  | Sex | Weight (lbs) | CIBDAI | Histopathology                                                                                                                                                                                                 | Therapy/Diet at time of sample collection                                          |
|----------------|-----------|------------------------|-----|--------------|--------|----------------------------------------------------------------------------------------------------------------------------------------------------------------------------------------------------------------|------------------------------------------------------------------------------------|
| A_IBD_1        | 6.5       | Golden Retriever       | n/a | 74.8         | 7      | Lymphocytic-plasmacytic gastritis, eosinophilic enteritis;                                                                                                                                                     | Hill's advanced chicken and rice                                                   |
| A_IBD_3        | 7.6       | Bichon Frisé           | f   | 15.2         | 5      | Lymphocytic-plasmacytic gastritis/colitis                                                                                                                                                                      | Hill's Prescription i/d                                                            |
| A_IBD_4        | 4.4       | Bullmastiff            | fs  | 94.2         | 5      | Moderate chronic active gastritis, duodenitis, colitis, mixed cell-type                                                                                                                                        | Fresh boiled rumen + cereals                                                       |
| A_IBD_5        | 3.9       | Great Dane             | m   | 130          | 7      | Moderate mixed cell-type (lymphocytes, plasma cells, macrophages) gastritis, duodenitis, and colitis                                                                                                           | James Wellbeloved Lamb and rice                                                    |
| A_IBD_6        | 3.5       | Shetland Sheepdog      | m   | 18.5         | 8      | Moderate to severe follicular gastritis, mild lymphocytic-plasmacytic, moderate Lymphocytic-plasmacytic chronic colitis                                                                                        | Eukanuba Jogging Agility                                                           |
| A_IBD_7        | 0.8       | Boxer                  | m   | 55           | 9      | Moderate eosinophilic chronic active colitis, moderate chronic active gastritis                                                                                                                                | James Wellbeloved Duck and rice                                                    |
| A_IBD_8        | 0.6       | Papillon               | mn  | 9            | 6      | Moderate lymphocytic-plasmacytic enteritis with villous atrophy, moderate lymphocytic-plasmacytic colitis                                                                                                      | Royal Canin Urinary                                                                |
| A_IBD_9        | 2.4       | Miniature Poodle       | m   | 12.3         | 8      | Moderate lymphocytic-plasmacytic gastritis with fibrosis, normal duodenum, mild lymphocytic-plasmacytic colitis                                                                                                | Hill's Science Plan Adult lamb and rice                                            |
| A_IBD_10       | 2         | Rottweiler             | fs  | 67.1         | 7      | Mild eosinophilic gastritis and enteritis, mild lymphocytic-plasmacytic colitis                                                                                                                                | Hill's Prescription i/d                                                            |
| Controlled IBD | Age (yrs) | Breed                  | Sex | Weight (lbs) | CIBDAI | Histopathology                                                                                                                                                                                                 | Therapy/Diet at time of sample collection                                          |
| S-IBD_1        | 5.8       | Mixed breed            | m   | 59.4         | 2      | Chronic moderate lymphocytic-plasmacytic colitis with polyps, mild superficial chronic gastritis                                                                                                               | budosenide, azathioprine, olsalazine; Hill's Prescription d/d salmon and rice      |
| S-IBD_2        | 8.7       | Shetland Sheepdog      | f   | 18.5         | 1      | Moderate to severe diffuse lymphocytic-plasmacytic gastritis with fibrosis (mild- severe in different locations), moderate lymphocytic-plasmacytic enteritis, mild to moderate chronic mixed cell-type colitis | methylprednisolone, psyllium; RC Sensitivity Control                               |
| S-IBD_3        | 4.2       | Norwegian Elkhound     | m   | 57.2         | 1      | Moderate chronic mixed cell-type colitis with prominent fibrosis, mild superficial chronic mixed cell-type gastritis and enteritis                                                                             | prednisolone; Hill's Prescription d/d duck and rice                                |
| S-IBD_4        | 8         | Parson Russell Terrier | m   | 19.1         | 1      | Moderate chronic active mixed cell-type gastritis and enteritis, mild colitis                                                                                                                                  | methylprednisolone, azathioprine, psyllium; Hill's d/d duck and rice               |
| S-IBD_5        | 3.8       | Hungarian Vizsla       | m   | 55           | 2      | Moderate lymphocytic-plasmacytic colitis with multiple erosions and moderate fibrosis, moderate chronic mixed cell-type gastritis                                                                              | methylprednisolone, psyllium; RC Sensitivity Control                               |
| S-IBD_6        | 5.7       | Weimaraner             | fs  | 70.4         | 1      | Chronic lymphocytic-plasmacytic enteritis and colitis                                                                                                                                                          | budosenide, azathioprine; RC Hypoallergenic                                        |
| S-IBD_7        | 3.7       | Mixed breed            | m   | 74.4         | 2      | Moderate chronic active mixed cell-type follicular gastritis, moderate chronic mixed cell-type enteritis and colitis                                                                                           | prednisolone; Bento Kronen lamb and rice                                           |
| S-IBD_8        | 4         | Mixed breed            | mn  | 19.1         | 1      | Moderate chronic active mixed cell-type gastritis and colitis, mild enteritis. Mild-moderate patchy fibrosis of stomach and colon                                                                              | prednisolone, ProSoluble (probiotics); Hill's Science Plan lamb and rice           |
| S-IBD_9        | 6.5       | Bernese Mountain Dog   | m   | 91.7         | 2      | Mild chronic lymphocytic-plasmacytic gastritis and colitis                                                                                                                                                     | methylprednisolone, azathioprine, olsalazine, metoclopramide, psyllium; Hill's Z/D |
| S-IBD_10       | 8.6       | Lhasa Apso             | f   | 18.7         | 2      | Moderate atrophic gastritis, eosinophilic enteritis and colitis                                                                                                                                                | prednisolone, cyclosporine, olsalazine; RC Hypoallergenic                          |

m=male intact; f=female intact; mn=male neutered; fs=female spayed; IBD=inflammatory bowel disease; CIBDAI=canine IBD activity index
